# Supplementary material
Source: PubMed Central journal article supplement (PMC5071571)

# Supplementary Figure S3

**a**

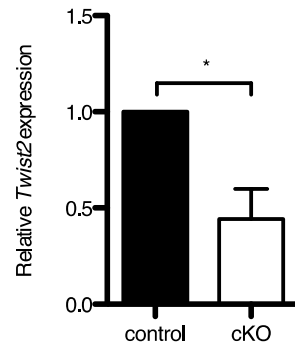

**b**

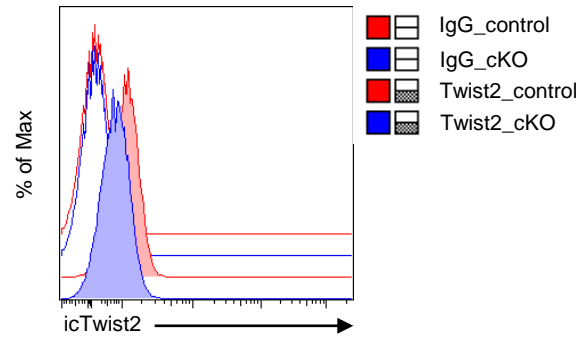

**c**

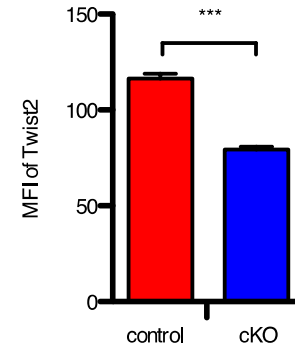

Supplement: cdd201668x4.pdf [file cdd201668x4.pdf]
